# Supplementary material
Source: PubMed Central journal article supplement (PMC240704)
Supplement: pnas_100_22_12830__1.pdf [file pnas_100_22_12830__1.pdf]

Table 1. Annotation of genes and protein coding regions in Antarctic fosmid ANT32C12

| #  | Nucleotide range | Dir. | Putative function                                               | Closest BLASTP hit (E-value) |                |
|----|------------------|------|-----------------------------------------------------------------|------------------------------|----------------|
| 1  | 1 - 1009         | -    | Predicted acyl-CoA transferases/carnitine dehydratase           | CAB55821.1 (8e-51)           | alpha          |
| 2  | 1160 - 2311      | +    | Predicted acyl-CoA dehydrogenases                               | ZP_00084445.1 (1e-151)       | gamma          |
| 3  | 2314 - 3621      | -    | Predicted ATP-dependent exoDNase (exonuclease V), alpha subunit | NP_809634.1 (1e-65)          | BCF            |
| 4  | 3744 - 4424      | +    | Predicted methylase                                             | NP_796491.1 (1e-38)          | gamma          |
| 5  | 4421 - 4855      | -    | Conserved hypothetical protein                                  | ZP_00032675.1 (6e-11)        | beta           |
| 6  | 4833 - 6035      | +    | Putative beta-lactamase class C                                 | NP_250918.1 (1e-75)          | gamma          |
| 7  | 6115 - 6684      | +    | Hypothetical protein                                            | -                            | -              |
| 8  | 6759 - 7394      | +    | Conserved hypothetical protein                                  | NP_798383.1 (3e-17)          | gamma          |
| 9  | 7512 - 7817      | +    | Conserved hypothetical protein                                  | AAO52198.1 (6e-27)           | eucarya        |
| 10 | 7887 - 8393      | +    | Conserved hypothetical protein                                  | NP_353310.1 (2e-11)          | alpha          |
| 11 | 8383 - 9756      | +    | Predicted NAD-dependent aldehyde dehydrogenases                 | NP_534637.1 (1e-144)         | alpha          |
| 12 | 9746 - 10753     | +    | Putative saccharopine dehydrogenase                             | NP_105333.1 (1e-74)          | alpha          |
| 13 | 11063 - 11260    | -    | Predicted transcriptional regulators                            | NP_421035.1 (2e-11)          | alpha          |
| 14 | 11270 - 11719    | -    | Hypothetical protein                                            | -                            | -              |
| 15 | 11845 - 12336    | +    | Conserved hypothetical protein                                  | ZP_00055759.1 (8e-07)        | alpha          |
| 16 | 12360 - 13046    | +    | Conserved hypothetical protein                                  | NP_654746.1 (4e-23)          | LGC            |
| 17 | 13049 - 13672    | +    | Predicted 1-acyl-sn-glycerol-3-phosphate acyltransferase        | ZP_00064877.1 (2e-25)        | gamma          |
| 18 | 13669 - 15954    | -    | Conserved hypothetical protein                                  | NP_710310.1 (1e-117)         | spirochaetales |
| 19 | 15641 - 16333    | +    | Predicted enoyl-CoA hydratase/carnitine racemase                | NP_250439.1 (2e-35)          | gamma          |
| 20 | 16351 - 16857    | +    | Predicted acetyltransferase, GNAT superfamily                   | ZP_00100576.1 (2e-11)        | LGC            |
| 21 | 16905 - 17789    | +    | Conserved hypothetical protein                                  | NP_207712.1 (1e-06)          | epsilon        |
| 22 | 18003 - 18695    | -    | Hypothetical protein                                            | -                            | -              |
| 23 | 18787 - 19512    | -    | Conserved hypothetical protein                                  | ZP_00126659.1 (2e-05)        | gamma          |
| 24 | 19612 - 21402    | -    | Predicted TypA membrane GTPase                                  | ZP_00065644.1 (0.0)          | gamma          |
| 25 | 21443 - 22723    | +    | Predicted metal-dependent amidase/aminoacylase/carboxypeptidase | NP_639131.1 (1e-106)         | gamma          |
| 26 | 22795 - 23760    | +    | Predicted dioxygenase related to 2-nitropropane dioxygenase     | NP_421175.1 (1e-111)         | alpha          |
| 27 | 24302 - 25231    | +    | Predicted oxidoreductase                                        | NP_250267.1 (1e-84)          | gamma          |
| 28 | 25228 - 25596    | -    | Hypothetical protein                                            | -                            | -              |
| 29 | 25776 - 26192    | -    | Conserved hypothetical protein                                  | NP_203440.1 (4e-08)          | bacteriophage  |
| 30 | 26247 - 27233    | -    | Conserved hypothetical protein                                  | ZP_00115177.1 (9e-33)        | cyanobacteria  |
| 31 | 27351 - 27911    | +    | Conserved hypothetical protein                                  | ZP_00065866.1 (2e-41)        | gamma          |
| 32 | 28050 - 30164    | +    | Predicted TonB-dependent receptor protein                       | AAG10467.1 (0.0)             | gamma          |
| 33 | 30154 - 30750    | +    | Putative nicotinamide mononucleotide transporter                | AAG10468.1 (5e-59)           | gamma          |
| 34 | 30728 - 31570    | +    | Predicted LicA, choline kinase                                  | AAG10469.1 (1e-37)           | gamma          |
| 35 | 31572 - 32369    | -    | Predicted oxidoreductase                                        | AAG10472.1 (1e-110)          | gamma          |
| 36 | 32446 - 33162    | +    | Predicted dehydrogenase                                         | AAG10473.1 (2e-86)           | gamma          |
| 37 | 33226 - 33978    | -    | Proteorhodopsin                                                 | AAK30197.1 (1e-131)          | gamma          |
| 38 | 34092 - 36389    | -    | Predicted TonB receptor protein                                 | NP_419273.1 (1e-42)          | alpha          |
| 39 | 36504 - 36986    | +    | Predicted phosphopantetheine adenyltransferase                  | AAG10476.1 (3e-73)           | gamma          |
| 40 | 36983 - 37792    | -    | Predicted formamidopyrimidine-DNA glycosylase                   | AAG10477.1 (1e-105)          | gamma          |
| 41 | 37796 - 39130    | -    | Predicted outer membrane protein TolC                           | AAG10478.1 (0.0)             | gamma          |
