# Supplementary material
Source: PubMed Central journal article supplement (PMC240704)
Supplement: pnas_100_22_12830__2.pdf [file pnas_100_22_12830__2.pdf]

Table 2. Annotation of genes and protein coding regions in Antarctic fosmid ANT8C10

| #  | Nucleotide range | Dir. | Putative function                                               | Closest BLASTP hit (E-value) |                |
|----|------------------|------|-----------------------------------------------------------------|------------------------------|----------------|
| 1  | 956 - 1300       | -    | Hypothetical protein                                            | -                            | -              |
| 2  | 1527 - 1913      | +    | Hypothetical protein                                            | -                            | -              |
| 3  | 2062 - 3969      | +    | Putative ATP-dependent RNA helicase                             | ZP_00066212.1 (1e-118)       | gamma          |
| 4  | 3958 - 4815      | -    | Predicted phosphatase                                           | NP_713134.1 (7e-12)          | spirochaetales |
| 5  | 4864 - 5847      | -    | Predicted oxidoreductase                                        | NP_641173.1 (2e-88)          | gamma          |
| 6  | 5888 - 6367      | -    | Conserved hypothetical protein                                  | ZP_00117528.1 (3e-13)        | BCF            |
| 7  | 6643 - 7059      | -    | Hypothetical protein                                            | -                            | -              |
| 8  | 7450 - 8619      | +    | Predicted Zn-dependent dipeptidase                              | ZP_00095596.1 (2e-82)        | alpha          |
| 9  | 8622 - 9464      | +    | Conserved hypothetical protein                                  | ZP_00008601.1 (5e-31)        | alpha          |
| 10 | 9476 - 10324     | +    | Predicted sterol desaturase                                     | NP_800607.1 (4e-52)          | gamma          |
| 11 | 10352 - 11131    | +    | Conserved hypothetical protein                                  | NP_490451.1 (2e-61)          | cyanobacteria  |
| 12 | 11132 - 11533    | +    | Hypothetical protein                                            | -                            | -              |
| 13 | 11514 - 12200    | -    | Predicted nitroreductase                                        | NP_770830.1 (1e-67)          | alpha          |
| 14 | 12265 - 13521    | -    | Predicted acyl-CoA transferases/carnitine dehydratase           | CAB55821.1 (3e-57)           | alpha          |
| 15 | 13672 - 14823    | +    | Predicted acyl-CoA dehydrogenases                               | ZP_00084445.1 (1e-151)       | gamma          |
| 16 | 14826 - 16133    | -    | Predicted ATP-dependent exoDNase (exonuclease V), alpha subunit | NP_809634.1 (1e-65)          | BCF            |
| 17 | 16298 - 16936    | +    | Predicted methylase                                             | NP_796491.1 (1e-38)          | gamma          |
| 18 | 16933 - 17367    | -    | Conserved hypothetical protein                                  | NP_417038.1 (8e-11)          | gamma          |
| 19 | 17345 - 18547    | +    | Predicted beta-lactamase class C                                | NP_250918.1 (8e-76)          | gamma          |
| 20 | 18627 - 19196    | +    | Hypothetical protein                                            | -                            | -              |
| 21 | 19270 - 19905    | +    | Conserved hypothetical protein                                  | NP_798383.1 (4e-17)          | gamma          |
| 22 | 20023 - 20328    | +    | Conserved hypothetical protein                                  | AAO52198.1 (6e-27)           | eucarya        |
| 23 | 20398 - 20904    | +    | Conserved hypothetical protein                                  | NP_353310.1 (1e-10)          | alpha          |
| 24 | 20894 - 22267    | +    | Predicted NAD-dependent aldehyde dehydrogenase                  | NP_534637.1 (1e-143)         | alpha          |
| 25 | 22257 - 23264    | +    | Putative saccharopine dehydrogenase                             | NP_105333.1 (1e-74)          | alpha          |
| 26 | 24156 - 24605    | -    | Hypothetical protein                                            | -                            | -              |
| 27 | 24731 - 25222    | +    | Conserved hypothetical protein                                  | ZP_00055759.1 (8e-07)        | alpha          |
| 28 | 25246 - 25932    | +    | Conserved hypothetical protein                                  | NP_654746.1 (4e-23)          | LGC            |
| 29 | 25935 - 26558    | +    | Predicted 1-acyl-sn-glycerol-3-phosphate acyltransferase        | ZP_00064877.1 (7e-25)        | gamma          |
| 30 | 26555 - 28387    | -    | Conserved hypothetical protein                                  | NP_710310.1 (1e-119)         | spirochaetales |
| 31 | 28529 - 29224    | +    | Predicted enoyl-CoA hydratase/carnitine racemase                | NP_250439.1 (2e-35)          | gamma          |
| 32 | 29242 - 29748    | +    | Predicted acetyltransferase, GNAT superfamily                   | ZP_00100576.1 (4e-12)        | LGC            |
| 33 | 30116 - 30808    | -    | Hypothetical protein                                            | -                            | -              |
| 34 | 30900 - 31631    | -    | Hypothetical protein                                            | -                            | -              |
| 35 | 31731 - 33521    | -    | Predicted TypA membrane GTPase                                  | ZP_00065644.1 (0.0)          | gamma          |
| 36 | 33562 - 34842    | +    | Predicted metal-dependent amidase/aminoacylase/carboxypeptidase | NP_639131.1 (1e-106)         | gamma          |
| 37 | 34914 - 35879    | +    | Predicted dioxygenase related to 2-nitropropane dioxygenase     | NP_421175.1 (1e-111)         | alpha          |
| 38 | 36421 - 37350    | +    | Predicted oxidoreductase                                        | NP_250267.1 (7e-85)          | gamma          |
| 39 | 37347 - 37715    | -    | Hypothetical protein                                            | -                            | -              |
