# Supplementary material
Source: PubMed Central journal article supplement (PMC240704)
Supplement: pnas_100_22_12830__3.pdf [file pnas_100_22_12830__3.pdf]

Table 3. Annotation of genes and protein coding regions in Hawaiian BAC clone HOT2C01

| #  | Nucleotide range | Dir. | Putative function                                                 | Closest BLASTP hit (E-value) |               |
|----|------------------|------|-------------------------------------------------------------------|------------------------------|---------------|
| 1  | 85 - 756         | -    | Ribosomal protein S3                                              | ZP_00012761.1 (5e-85)        | alpha         |
| 2  | 760 - 1149       | -    | Ribosomal protein L22                                             | ZP_00053920.1 (1e-27)        | alpha         |
| 3  | 1425 - 2270      | -    | Ribosomal protein L2                                              | NP_360640.1 (1e-89)          | alpha         |
| 4  | 2275 - 2589      | -    | Ribosomal protein L23                                             | NP_102122.1 (1e-23)          | alpha         |
| 5  | 2570 - 3259      | -    | Ribosomal protein L4                                              | NP_354922.1 (6e-32)          | alpha         |
| 6  | 3195 - 3884      | -    | Ribosomal protein L3                                              | ZP_00004268.1 (5e-46)        | alpha         |
| 7  | 3888 - 4196      | -    | Ribosomal protein S10                                             | ZP_00013720.1 (2e-42)        | alpha         |
| 8  | 4206 - 6281      | -    | Predicted translation elongation factor G (EF-G)                  | ZP_00013722.1 (0.0)          | alpha         |
| 9  | 6283 - 6753      | -    | Ribosomal protein S7                                              | NP_223836.1 (4e-56)          | epsilon       |
| 10 | 6754 - 7125      | -    | Ribosomal protein S12                                             | NP_698242.1 (4e-56)          | alpha         |
| 11 | 7266 - 11453     | -    | DNA-directed RNA polymerase beta' subunit (RpoC)                  | NP_354930.1 (0.0)            | alpha         |
| 12 | 11462 - 15565    | -    | DNA-directed RNA polymerase beta subunit (RpoB)                   | ZP_00012785.1 (0.0)          | alpha         |
| 13 | 15634 - 16014    | -    | Ribosomal protein L7/L12                                          | ZP_00012786.1 (2e-34)        | alpha         |
| 14 | 16038 - 16544    | -    | Ribosomal protein L10                                             | ZP_00052577.1 (3e-38)        | alpha         |
| 15 | 16548 - 17231    | -    | Ribosomal protein L1                                              | ZP_00013730.1 (1e-59)        | alpha         |
| 16 | 17231 - 17659    | -    | Ribosomal protein L11                                             | NP_772055.1 (5e-44)          | alpha         |
| 17 | 17659 - 18192    | -    | Predicted transcription antiterminator NusG                       | ZP_00013732.1 (7e-54)        | alpha         |
| 18 | 18196 - 18429    | -    | Predicted preprotein translocase subunit SecE                     | ZP_00012792.1 (6e-07)        | alpha         |
| 19 | 18400 - 18475    | -    | tRNA Trp (CCA anticodon)                                          |                              |               |
| 20 | 18480 - 19670    | -    | Predicted translation elongation factor Tu (EF-Tu)                | ZP_00013734.1 (0.0)          | alpha         |
| 21 | 19706 - 19779    | -    | tRNA Gly (TCC anticodon)                                          |                              |               |
| 22 | 19814 - 19898    | -    | tRNA Tyr (GTA anticodon)                                          |                              |               |
| 23 | 20049 - 20822    | +    | Predicted tRNA/rRNA methyltransferase                             | ZP_00053931.1 (4e-35)        | alpha         |
| 24 | 20972 - 21047    | +    | tRNA Thr (TGT anticodon)                                          |                              |               |
| 25 | 21402 - 22022    | -    | Conserved hypothetical protein                                    | NP_655509.1 (3e-15)          | LGC           |
| 26 | 22073 - 23272    | -    | Predicted NAD-dependent formate dehydrogenase                     | AAG10470.1 (0.0)             | gamma         |
| 27 | 23296 - 24042    | -    | Putative aldolase class II protein                                | Q9A8Z4 (9e-72)               | alpha         |
| 28 | 24035 - 25528    | -    | Predicted glycerol kinase                                         | Q9X1E4 (1e-142)              | thermatogales |
| 29 | 25609 - 26376    | +    | Predicted kinase                                                  | ZP_00056540.1 (9e-75)        | alpha         |
| 30 | 26373 - 27233    | -    | Hypothetical protein                                              |                              | -             |
| 31 | 27237 - 28136    | -    | Putative SinH homolog                                             | NP_754913.1 (1e-05)          | gamma         |
| 32 | 28183 - 28270    | -    | tRNA Leu (TAA anticodon)                                          |                              |               |
| 33 | 28378 - 29070    | -    | Proteorhodopsin                                                   | AAO73933.1 (2e-81)           | gamma         |
| 34 | 29195 - 29917    | -    | Predicted nucleotide-utilizing enzyme related to MoeA             | ZP_00096270.1 (3e-55)        | alpha         |
| 35 | 29924 - 30625    | +    | Predicted sugar fermentation stimulation protein                  | NP_354599.1 (5e-50)          | alpha         |
| 36 | 30661 - 31392    | +    | Predicted methionine aminopeptidase                               | NP_421476.1 (2e-84)          | alpha         |
| 37 | 31417 - 32709    | +    | Predicted adenylosuccinate lyase                                  | NP_772330.1 (1e-146)         | alpha         |
| 38 | 32960 - 33289    | -    | Conserved hypothetical protein                                    | NP_101948.1 (4e-27)          | alpha         |
| 39 | 33362 - 34081    | +    | Predicted phosphoribosylaminoimidazolesuccinocarboxamide synthase | NP_385878.1 (7e-60)          | alpha         |
| 40 | 34331 - 35002    | +    | Predicted phosphoribosylformylglycinamide (FGAM) synthase I       | ZP_00054281.1 (2e-69)        | alpha         |
| 41 | 35002 - 37200    | +    | Predicted phosphoribosylformylglycinamide (FGAM) synthase II      | ZP_00054280.1 (0.0)          | alpha         |
| 42 | 37212 - 38021    | -    | Conserved hypothetical protein                                    | ZP_00104055.1 (2e-29)        | cyanobacteria |
| 43 | 38027 - 38500    | -    | Hypothetical protein                                              | -                            | -             |
| 44 | 38840 - 39313    | +    | Hypothetical protein                                              | -                            | -             |
| 45 | 39861 - 40790    | -    | Hypothetical protein                                              | -                            | -             |
| 46 | 40800 - 41108    | -    | Hypothetical protein                                              | -                            | -             |
| 47 | 41138 - 41941    | -    | Hypothetical protein                                              | -                            | -             |
