# Supplementary material
Source: PubMed Central journal article supplement (PMC240704)
Supplement: pnas_100_22_12830__4.pdf [file pnas_100_22_12830__4.pdf]

Table 4. Annotation of genes and protein coding regions in Monterey Bay BAC clone EBAC31A08

| #  | Nucleotide range | Dir. | Putative function                                             | Closest BLASTP hit (E-value) |                |
|----|------------------|------|---------------------------------------------------------------|------------------------------|----------------|
| 1  | 59 - 583         | +    | Predicted glutathione peroxidase                              | NP_800761.1 (3e-38)          | gamma          |
| 2  | 589 - 1227       | -    | Predicted ribose 5-phosphate isomerase                        | NP_747251.1 (1e-55)          | gamma          |
| 3  | 1266 - 2807      | +    | Predicted threonine dehydratase                               | NP_249022.1 (1e-128)         | gamma          |
| 4  | 2812 - 5097      | -    | Conserved hypothetical protein                                | ZP_00102669.1 (1e-44)        | LGC            |
| 5  | 5126 - 5701      | -    | Predicted 5-formyltetrahydrofolate cyclo-ligase               | NP_439018.1 (1e-14)          | gamma          |
| 6  | 6433 - 7728      | +    | Predicted Xaa-Pro aminopeptidase                              | ZP_00067121.1 (1e-107)       | gamma          |
| 7  | 7732 - 8892      | +    | Predicted 2-polyprenyl-6-methoxyphenol hydroxylase            | ZP_00124991.1 (7e-38)        | gamma          |
| 8  | 8900 - 9136      | -    | Ribosomal protein L28                                         | NP_439112.1 (2e-25)          | gamma          |
| 9  | 9182 - 9670      | +    | Predicted phosphohistidine phosphatase SixA                   | NP_660997.1 (5e-17)          | BCF            |
| 10 | 9710 - 10129     | +    | Predicted dUTPase                                             | NP_719777.1 (8e-48)          | gamma          |
| 11 | 10443 - 12431    | +    | Predicted primosomal protein N' (replication factor Y)        | AAO91308.1 (1e-135)          | gamma          |
| 12 | 12428 - 13510    | -    | Predicted N-acetylmuramoyl-L-alanine amidase                  | ZP_00065013.1 (3e-50)        | gamma          |
| 13 | 13670 - 14131    | -    | Predicted ATPase or kinase                                    | NP_253635.1 (2e-17)          | gamma          |
| 14 | 14128 - 14985    | -    | Predicted sugar kinase                                        | ZP_00065015.1 (3e-46)        | gamma          |
| 15 | 15024 - 16391    | -    | Conserved hypothetical protein                                | ZP_00095220.1 (3e-13)        | alpha          |
| 16 | 16395 - 17288    | -    | Predicted hydrolase                                           | NP_422102.1 (7e-29)          | alpha          |
| 17 | 17321 - 18115    | +    | Predicted NTP pyrophosphohydrolase                            | ZP_00012706.1 (1e-33)        | alpha          |
| 18 | 18121 - 18918    | +    | Predicted Zn-dependent hydrolase                              | ZP_00021230.1 (3e-57)        | beta           |
| 19 | 18915 - 19298    | -    | Hypothetical protein                                          | -                            | -              |
| 20 | 19295 - 21220    | -    | Predicted acyl-coenzyme A synthetase/AMP-(fatty) acid ligase  | ZP_00066690.1 (0.0)          | gamma          |
| 21 | 21223 - 21888    | -    | Predicted deoxynucleoside kinase                              | ZP_00067328.1 (2e-71)        | gamma          |
| 22 | 21915 - 23147    | -    | Predicted tRNA nucleotidyltransferase/poly(A) polymerase      | ZP_00091219.1 (3e-89)        | gamma          |
| 23 | 23180 - 23737    | -    | Predicted DnaK suppressor protein                             | NP_790808.1 (7e-41)          | gamma          |
| 24 | 23793 - 24794    | -    | Predicted ribokinase                                          | ZP_00067399.1 (4e-53)        | gamma          |
| 25 | 24784 - 26034    | -    | Predicted glutamate-1-semialdehyde aminotransferase           | NP_245399.1 (1e-131)         | gamma          |
| 26 | 26143 - 26664    | -    | Predicted flavodoxins                                         | NP_715667.1 (8e-54)          | gamma          |
| 27 | 26742 - 27248    | +    | Conserved hypothetical protein                                | NP_719733.1 (4e-06)          | gamma          |
| 28 | 27251 - 27580    | +    | Uncharacterized ACR                                           | ZP_00092439.1 (4e-27)        | gamma          |
| 29 | 27570 - 28664    | -    | Uncharacterized BCR                                           | NP_716933.1 (1e-55)          | gamma          |
| 30 | 28657 - 29910    | -    | Predicted metalloendopeptidase                                | ZP_00086772.1 (6e-76)        | gamma          |
| 31 | 29910 - 32876    | -    | Predicted NAD-dependent aldehyde dehydrogenase                | NP_719311.1 (0.0)            | gamma          |
| 32 | 33031 - 34218    | +    | Predicted tyrosyl-tRNA synthetase                             | NP_716935.1 (1e-138)         | gamma          |
| 33 | 34218 - 34682    | +    | Predicted FKBP-type peptidyl-prolyl cis-trans isomerase 1     | ZP_00092021.1 (2e-23)        | gamma          |
| 34 | 34679 - 36793    | -    | Predicted prolyl endopeptidase                                | NP_486573.1 (1e-171)         | cyanobacteria  |
| 35 | 36889 - 37488    | +    | Hypothetical protein                                          | -                            | -              |
| 36 | 37601 - 37678    | +    | tRNA Ile (GAT anticodon)                                      | -                            | -              |
| 37 | 37853 - 38530    | -    | Hypothetical protein                                          | -                            | -              |
| 38 | 38789 - 39154    | -    | Hypothetical protein                                          | -                            | -              |
| 39 | 39160 - 39567    | -    | Hypothetical protein                                          | -                            | -              |
| 40 | 39580 - 40185    | -    | Hypothetical protein                                          | -                            | -              |
| 41 | 40220 - 41566    | -    | Predicted Na <sup>+</sup> -driven multidrug efflux pump       | ZP_00011269.1 (1e-82)        | alpha          |
| 42 | 41820 - 43931    | +    | Predicted TonB-dependent receptor                             | NP_718299.1 (1e-131)         | gamma          |
| 43 | 43921 - 44517    | +    | Predicted nicotinamide mononucleotide transporter             | ZP_00067355.1 (2e-37)        | gamma          |
| 44 | 44501 - 45328    | +    | Predicted LicA choline kinase                                 | NP_561949.1 (6e-13)          | LGC            |
| 45 | 45404 - 46600    | +    | Predicted NAD-dependent formate dehydrogenase                 | CAA73696.1 (1e-170)          | gamma          |
| 46 | 46604 - 47572    | -    | Predicted 2-nitropropane dioxygenase                          | NP_769246.1 (1e-130)         | alpha          |
| 47 | 47582 - 48370    | -    | Predicted dehydrogenase                                       | ZP_00023929.1 (3e-49)        | beta           |
| 48 | 48446 - 49234    | +    | Predicted dehydrogenase                                       | ZP_00094214.1 (2e-48)        | alpha          |
| 49 | 49283 - 50797    | +    | Predicted acyl-CoA synthetases (AMP-forming)/AMP-acid ligases | ZP_00010336.1 (1e-159)       | alpha          |
| 50 | 50866 - 51615    | -    | Proteorhodopsin                                               | -                            | -              |
| 51 | 51815 - 52402    | +    | Predicted phosphopantetheine adenyltransferase                | NP_747224.1 (2e-44)          | gamma          |
| 52 | 52292 - 53104    | -    | Predicted formamidopyrimidine-DNA glycosylase                 | NP_418092.1 (5e-62)          | gamma          |
| 53 | 53107 - 54435    | -    | Predicted outer membrane protein TolC                         | NP_253661.1 (1e-70)          | gamma          |
| 54 | 54574 - 56469    | +    | Predicted DNA gyrase (topoisomerase II) B subunit             | NP_747018.1 (0.0)            | gamma          |
| 55 | 56472 - 58721    | +    | Predicted DNA gyrase (topoisomerase II) A subunit             | ZP_00067679.1 (0.0)          | gamma          |
| 56 | 58708 - 59985    | -    | Predicted PLP-dependent aminotransferase                      | ZP_00090273.1 (3e-92)        | gamma          |
| 57 | 59922 - 60422    | +    | Hypothetical protein                                          | -                            | -              |
| 58 | 60405 - 61655    | -    | Predicted 6-phosphofructokinase                               | ZP_00003577.1 (1e-137)       | beta           |
| 59 | 61709 - 63019    | +    | Predicted UDP-N-acetylmuramate-alanine ligase                 | NP_796693.1 (1e-94)          | gamma          |
| 60 | 63009 - 63599    | +    | Conserved hypothetical protein                                | ZP_00086879.1 (8e-18)        | gamma          |
| 61 | 63727 - 64032    | -    | Hypothetical protein                                          | -                            | -              |
| 62 | 64089 - 64397    | -    | Hypothetical protein                                          | -                            | -              |
| 63 | 64462 - 64926    | +    | Uncharacterized ACR                                           | NP_563516.1 (7e-24)          | LGC            |
| 64 | 64923 - 66761    | +    | Predicted penicillin-binding protein 2                        | NP_716793.1 (1e-102)         | gamma          |
| 65 | 66758 - 67315    | +    | Predicted rod shape-determining protein RodA                  | AAO90095.1 (5e-26)           | gamma          |
| 66 | 67393 - 67857    | +    | Predicted rod shape-determining protein RodA                  | ZP_00090590.1 (1e-35)        | gamma          |
| 67 | 67854 - 68741    | +    | Predicted membrane-bound lytic murein transglycosylase B      | ZP_00067290.1 (1e-58)        | gamma          |
| 68 | 68738 - 69895    | +    | Predicted D-alanyl-D-alanine carboxypeptidase                 | ZP_00126123.1 (2e-93)        | gamma          |
| 69 | 69879 - 70709    | +    | Predicted D-alanine aminotransferase                          | NP_243677.1 (3e-36)          | LGC            |
| 70 | 70702 - 71688    | -    | Predicted DNA polymerase III, delta subunit                   | NP_716797.1 (4e-12)          | gamma          |
| 71 | 71672 - 72136    | -    | Hypothetical protein                                          | -                            | -              |
| 72 | 72181 - 74595    | -    | Predicted Leucyl-tRNA synthetase                              | AAO90104.1 (0.0)             | gamma          |
| 73 | 74592 - 75935    | -    | Predicted biotin carboxylase                                  | ZP_00087052.1 (1e-147)       | gamma          |
| 74 | 75937 - 76380    | -    | Predicted biotin carboxyl carrier protein                     | NP_246029.1 (4e-33)          | gamma          |
| 75 | 76381 - 76821    | -    | Predicted 3-dehydroquinate dehydratase II                     | ZP_00123462.1 (6e-29)        | gamma          |
| 76 | 76874 - 77290    | -    | Predicted thiol-disulfide isomerase/thioredoxin               | NP_710001.1 (2e-12)          | gamma          |
| 77 | 77362 - 78369    | +    | Predicted esterase/lipase                                     | ZP_00011968.1 (5e-29)        | alpha          |
| 78 | 78366 - 79964    | +    | Predicted ABC transporter, ATP-binding protein                | NP_106147.1 (1e-155)         | alpha          |
| 79 | 80043 - 81641    | +    | Predicted dihydroxyacid dehydratase                           | NP_713139.1 (1e-172)         | spirochaetales |
| 80 | 81644 - 82642    | +    | Predicted delta-aminolevulinic acid dehydratase               | ZP_00065782.1 (4e-84)        | gamma          |
| 81 | 82639 - 82965    | +    | Predicted thiol-disulfide isomerase/thioredoxin               | ZP_00065824.1 (2e-28)        | gamma          |
| 82 | 83095 - 84372    | +    | Predicted transcription termination factor Rho                | NP_253926.1 (1e-178)         | gamma          |
| 83 | 84365 - 85066    | -    | Hypothetical protein                                          | -                            | -              |

|     |        |   |        |   |                                                        |                        |               |
|-----|--------|---|--------|---|--------------------------------------------------------|------------------------|---------------|
| 84  | 85056  | - | 85967  | - | Predicted porphobilinogen deaminase                    | O66621 (5e-51)         | aquificales   |
| 85  | 85964  | - | 86518  | - | Predicted N6-adenine-specific methylase                | NP_438926.1 (1e-29)    | gamma         |
| 86  | 86628  | - | 87062  | + | Potential flavoprotein oxygenase, DIM6/NTAB family     | ZP_00067862.1 (2e-13)  | gamma         |
| 87  | 87040  | - | 87531  | + | Conserved hypothetical protein                         | ZP_00067936.1 (1e-16)  | gamma         |
| 88  | 87524  | - | 88138  | - | Predicted transcriptional regulator, AcrR family       | ZP_00108788.1 (2e-19)  | cyanobacteria |
| 89  | 88237  | - | 89220  | + | Predicted membrane-fusion protein, AcrA family         | NP_718832.1 (5e-26)    | gamma         |
| 90  | 89222  | - | 92284  | + | Predicted cation/multidrug efflux pump                 | NP_485696.1 (1e-121)   | cyanobacteria |
| 91  | 92499  | - | 93317  | - | Predicted TPR-repeat-containing protein                | NP_742784.1 (8e-50)    | gamma         |
| 92  | 93398  | - | 94330  | + | Predicted pseudouridylate synthase, 23S rRNA-specific  | NP_796938.1 (2e-68)    | gamma         |
| 93  | 94425  | - | 96137  | + | Predicted thiamine pyrophosphate-requiring enzyme      | ZP_00064897.1 (0.0)    | gamma         |
| 94  | 96449  | - | 97492  | + | Predicted ketol-acid reductoisomerase                  | ZP_00003033.1 (1e-119) | beta          |
| 95  | 97663  | - | 99189  | + | 16S rRNA                                               |                        |               |
| 96  | 99433  | - | 102194 | + | 23S rRNA                                               |                        |               |
| 97  | 102589 | - | 103182 | + | Predicted dephospho-CoA kinase                         | O69082 (2e-39)         | gamma         |
| 98  | 103342 | - | 106053 | - | Predicted preprotein translocase subunit SecA          | ZP_00067433.1 (0.0)    | gamma         |
| 99  | 106096 | - | 107013 | - | Predicted UDP-3-O-acyl-N-acetylglucosamine deacetylase | NP_253096.1 (1e-104)   | gamma         |
| 100 | 107028 | - | 107750 | - | Predicted rRNA methylase                               | NP_290810.1 (7e-26)    | gamma         |
| 101 | 107747 | - | 109234 | - | Predicted exoribonuclease                              | AAO90604.1 (5e-92)     | gamma         |
| 102 | 109306 | - | 111915 | - | Predicted TonB-dependent receptor                      | NP_421988.1 (4e-53)    | alpha         |
| 103 | 111997 | - | 112398 | - | Hypothetical protein                                   | -                      | -             |
| 104 | 112464 | - | 114695 | - | Predicted outer membrane receptor protein              | NP_643138.1 (6e-48)    | gamma         |
| 105 | 115018 | - | 116073 | - | Predicted Zn-dependent alcohol dehydrogenase           | AAG10028.1 (4e-65)     | gamma         |
| 106 | 116152 | - | 117546 | + | Predicted amidohydrolase                               | NP_420779.1 (1e-135)   | alpha         |
| 107 | 117546 | - | 118811 | + | Predicted amidohydrolase                               | NP_638718.1 (1e-29)    | gamma         |
| 108 | 118817 | - | 118892 | - | tRNA Thr (TGT anticodon)                               |                        |               |
| 109 | 118915 | - | 119472 | - | Predicted peptide methionine sulfoxide reductase       | NP_439944.1 (1e-60)    | cyanobacteria |
| 110 | 119477 | - | 120226 | - | Predicted biotin-(acetyl-CoA carboxylase) ligase       | NP_252970.1 (2e-20)    | gamma         |
| 111 | 120278 | - | 120361 | + | tRNA Tyr (GTA anticodon)                               |                        |               |
| 112 | 120482 | - | 120556 | + | tRNA Thr (GGT anticodon)                               |                        |               |
| 113 | 120594 | - | 121031 | + | GTPases - translation elongation factor Tu (EF-Tu)     | NP_799149.1 (3e-58)    | gamma         |
| 114 | 121045 | - | 121782 | + | GTPases - translation elongation factor Tu (EF-Tu)     | AAO89781.1 (1e-106)    | gamma         |
| 115 | 121853 | - | 121928 | + | tRNA Trp (CCA anticodon)                               |                        |               |
| 116 | 121959 | - | 122321 | + | Predicted preprotein translocase subunit SecE          | NP_252966.1 (5e-17)    | gamma         |
| 117 | 122326 | - | 122853 | + | Predicted transcription antiterminator NusG            | NP_457922.1 (6e-60)    | gamma         |
| 118 | 122853 | - | 123281 | + | Ribosomal protein L11                                  | NP_282996.1 (8e-51)    | beta          |
| 119 | 123278 | - | 123970 | + | Ribosomal protein L1                                   | NP_252963.1 (7e-60)    | gamma         |
| 120 | 124084 | - | 124662 | + | Ribosomal protein L10                                  | ZP_00067854.1 (2e-45)  | gamma         |
| 121 | 124681 | - | 125061 | + | Ribosomal protein L7/L12                               | ZP_00067853.1 (3e-28)  | gamma         |
| 122 | 125101 | - | 128758 | + | DNA-directed RNA polymerase beta subunit (RpoB)        | ZP_00067852.1 (0.0)    | gamma         |
