# Supplementary material
Source: PubMed Central journal article supplement (PMC240704)
Supplement: pnas_100_22_12830__5.pdf [file pnas_100_22_12830__5.pdf]

Table 5. Annotation of genes and protein coding regions in Monterey Bay BAC clone EB000-45B06

| #  | Nucleotide range | Dir. | Putative function                                               | Closest BLASTP hit (E-value) |               |
|----|------------------|------|-----------------------------------------------------------------|------------------------------|---------------|
| 1  | 1 - 2655         | +    | 23S rRNA (incomplete)                                           |                              |               |
| 2  | 3049 - 3642      | +    | Predicted dephospho-CoA kinase                                  | O69082 (5e-39)               | gamma         |
| 3  | 3802 - 6513      | -    | Predicted preprotein translocase subunit SecA                   | ZP_00067433.1 (0.0)          | gamma         |
| 4  | 6556 - 7473      | -    | Predicted UDP-3-O-acyl-N-acetylglucosamine deacetylase          | NP_253096.1 (1e-104)         | gamma         |
| 5  | 7488 - 8210      | -    | Predicted 23S rRNA methylases                                   | NP_290810.1 (2e-25)          | gamma         |
| 6  | 8207 - 9694      | -    | Predicted exoribonuclease R                                     | AAO90604.1 (3e-92)           | gamma         |
| 7  | 9766 - 12375     | -    | TonB-dependent receptor                                         | NP_421988.1 (3e-53)          | alpha         |
| 8  | 12457 - 12858    | -    | Hypothetical protein                                            | -                            | -             |
| 9  | 12924 - 15131    | -    | Predicted outer membrane receptor proteins, mostly Fe transport | NP_638006.1 (7e-51)          | gamma         |
| 10 | 15461 - 16516    | -    | Predicted Zn-dependent alcohol dehydrogenase                    | AAG10028.1 (1e-65)           | gamma         |
| 11 | 16595 - 17989    | +    | Predicted amidohydrolase                                        | NP_638717.1 (1e-135)         | gamma         |
| 12 | 17989 - 19254    | +    | Predicted amidohydrolase                                        | NP_420780.1 (3e-30)          | alpha         |
| 13 | 19260 - 19335    | -    | tRNA Thr (TGT anticodon)                                        |                              |               |
| 14 | 19358 - 19915    | -    | Predicted peptide methionine sulfoxide reductase                | NP_439944.1 (8e-61)          | cyanobacteria |
| 15 | 19920 - 20669    | -    | Predicted biotin-(acetyl-CoA carboxylase) ligase                | NP_252970.1 (2e-20)          | gamma         |
| 16 | 20720 - 20803    | +    | tRNA Tyr (GTA anticodon)                                        |                              |               |
| 17 | 20924 - 20998    | +    | tRNA Thr (GGT anticodon)                                        |                              |               |
| 18 | 21036 - 22226    | +    | Predicted GTPases - translation elongation factor Tu (EF-Tu)    | ZP_00002218.1 (1e-173)       | beta          |
| 19 | 22297 - 22372    | +    | tRNA Trp (CCA anticodon)                                        |                              |               |
| 20 | 22403 - 22765    | +    | Predicted preprotein translocase subunit SecE                   | NP_252966.1 (6e-18)          | gamma         |
| 21 | 22770 - 23297    | +    | Predicted transcription antiterminator NusG                     | NP_457922.1 (6e-60)          | gamma         |
| 22 | 23297 - 23725    | +    | Ribosomal protein L11                                           | NP_282996.1 (3e-51)          | beta          |
| 23 | 23722 - 24414    | +    | Ribosomal protein L1                                            | NP_252963.1 (2e-59)          | gamma         |
| 24 | 24528 - 25106    | +    | Ribosomal protein L10                                           | ZP_00067854.1 (2e-45)        | gamma         |
| 25 | 25125 - 25505    | +    | Ribosomal protein L7/L12                                        | ZP_00067853.1 (3e-28)        | gamma         |
| 26 | 25545 - 29606    | +    | DNA-directed RNA polymerase beta subunit (RpoB)                 | ZP_00067852.1 (0.0)          | gamma         |
| 27 | 29616 - 33797    | +    | DNA-directed RNA polymerase beta' subunit (RpoC)                | NP_252959.1 (0.0)            | gamma         |
| 28 | 33853 - 34224    | +    | Ribosomal protein S12                                           | NP_715866.1 (9e-56)          | gamma         |
| 29 | 34227 - 34697    | +    | Ribosomal protein S7                                            | ZP_00090899.1 (4e-59)        | gamma         |
| 30 | 34726 - 36828    | +    | Predicted GTPases - translation elongation factor G (EF-G)      | ZP_00067848.1 (0.0)          | gamma         |
| 31 | 36954 - 37265    | +    | Ribosomal protein S10                                           | NP_232225.1 (3e-38)          | gamma         |
| 32 | 37359 - 37961    | +    | Ribosomal protein L3                                            | AAO89796.1 (4e-51)           | gamma         |
| 33 | 37958 - 38572    | +    | Ribosomal protein L4                                            | ZP_00067991.1 (4e-62)        | gamma         |
| 34 | 38535 - 38861    | +    | Ribosomal protein L23                                           | ZP_00090905.1 (5e-17)        | gamma         |
| 35 | 38864 - 39691    | +    | Ribosomal protein L2                                            | ZP_00067989.1 (6e-98)        | gamma         |
| 36 | 40050 - 40304    | +    | Ribosomal protein L22                                           | ZP_00067987.1 (1e-21)        | gamma         |
| 37 | 40495 - 40962    | +    | Ribosomal protein S3                                            | NP_438942.1 (2e-57)          | gamma         |
| 38 | 40968 - 41378    | +    | Ribosomal protein L16/L10E                                      | NP_709101.1 (3e-57)          | gamma         |
| 39 | 41872 - 42240    | +    | Ribosomal protein L14                                           | NP_636291.1 (1e-48)          | gamma         |
| 40 | 42243 - 42572    | +    | Ribosomal protein L24                                           | ZP_00067982.1 (5e-11)        | gamma         |
| 41 | 42573 - 43112    | +    | Ribosomal protein L5                                            | NP_715883.1 (9e-62)          | gamma         |
| 42 | 43122 - 43427    | +    | Ribosomal protein S14                                           | NP_790486.1 (5e-29)          | gamma         |
| 43 | 43432 - 43827    | +    | Ribosomal protein S8                                            | ZP_00004334.1 (2e-31)        | alpha         |
| 44 | 43793 - 44371    | +    | Ribosomal protein L6                                            | ZP_00067979.1 (2e-53)        | gamma         |
| 45 | 44375 - 44722    | +    | Ribosomal protein L18                                           | NP_742636.1 (2e-29)          | gamma         |
| 46 | 44730 - 45239    | +    | Ribosomal protein S5                                            | ZP_00067978.1 (2e-56)        | gamma         |
| 47 | 45426 - 45932    | +    | Ribosomal protein L15                                           | NP_438956.1 (8e-33)          | gamma         |
| 48 | 45936 - 47237    | +    | Predicted preprotein translocase subunit SecY                   | ZP_00125956.1 (1e-150)       | gamma         |
| 49 | 47359 - 47718    | +    | Ribosomal protein S13                                           | ZP_00084778.1 (1e-38)        | gamma         |
| 50 | 47720 - 48097    | +    | Ribosomal protein S11                                           | NP_252930.1 (1e-43)          | gamma         |
| 51 | 48109 - 48732    | +    | Ribosomal protein S4                                            | NP_796660.1 (4e-78)          | gamma         |
| 52 | 48866 - 49717    | +    | DNA-directed RNA polymerase alpha subunit (RpoA)                | ZP_00067973.1 (1e-88)        | gamma         |
| 53 | 49722 - 50135    | +    | Ribosomal protein L17                                           | NP_759717.1 (2e-39)          | gamma         |
| 54 | 50137 - 52953    | -    | Predicted excinuclease ATPase subunit A                         | NP_742649.1 (0.0)            | gamma         |
| 55 | 53024 - 53464    | +    | Predicted single-stranded DNA-binding protein                   | AAO89829.1 (2e-43)           | gamma         |
| 56 | 53476 - 54345    | +    | Predicted enoyl-CoA hydratase/carnithine racemase               | NP_772244.1 (4e-81)          | alpha         |
| 57 | 54359 - 55438    | +    | Predicted NADH:flavin oxidoreductase                            | ZP_00086634.1 (1e-103)       | gamma         |
| 58 | 55435 - 56643    | -    | Predicted 3-oxoacyl-(acyl-carrier-protein) synthase             | ZP_00067995.1 (1e-137)       | gamma         |
| 59 | 56643 - 57167    | -    | Predicted 3-hydroxymyristoyl/3-hydroxydecanoyl-ACP dehydratase  | NP_250301.1 (2e-53)          | gamma         |
| 60 | 57164 - 58114    | -    | Predicted geranylgeranyl pyrophosphate synthase                 | ZP_00068004.1 (2e-48)        | gamma         |
| 61 | 58204 - 58524    | +    | Ribosomal protein L21                                           | ZP_00068005.1 (5e-17)        | gamma         |
| 62 | 58795 - 59352    | +    | Predicted GTPase protein                                        | AAO89940.1 (2e-41)           | gamma         |
| 63 | 59511 - 59816    | +    | Predicted GTPase protein                                        | NP_439038.1 (8e-10)          | gamma         |
| 64 | 60188 - 61108    | -    | Predicted TonB-dependent receptor                               | NP_796547.1 (2e-16)          | gamma         |
